# Supplementary material for: Transcriptome Profile of Rat Adrenal Evoked by Gonadectomy and Testosterone or Estradiol Replacement
Source: PubMed Central journal article supplement (PMC5309227; doi:10.3389/fendo.2017.00026), 2017-02-15

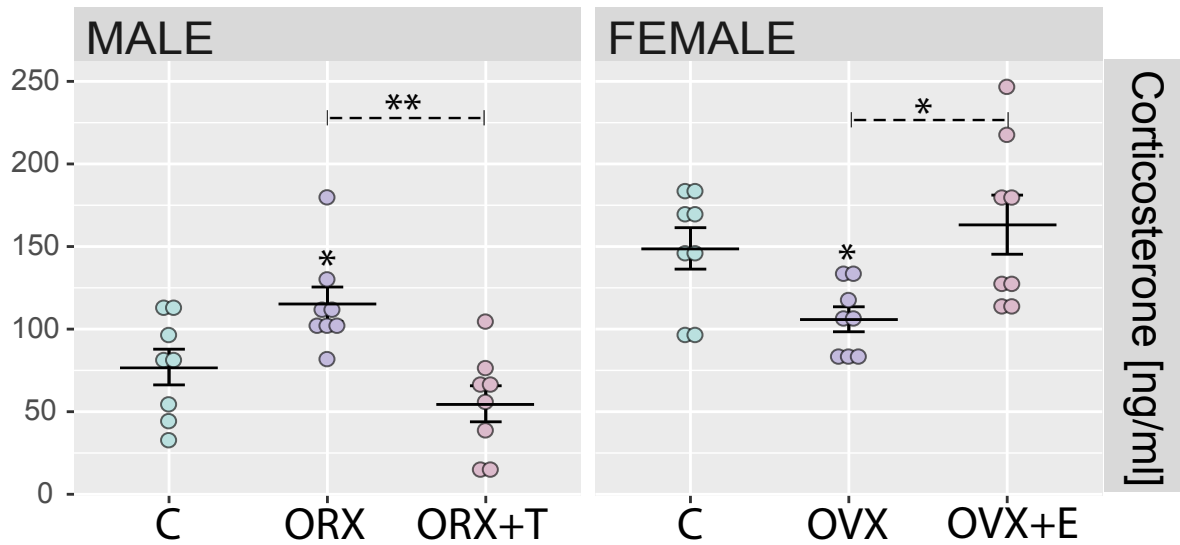

Supplement: image_1.pdf [file image_1.pdf]
